# Supplementary material for: Cinnamaldehyde treatment during adolescence improves white and brown adipose tissue metabolism in a male rat model of early obesity
Source: Royal Society of Chemistry journal article supplement (doi:10.1039/d1fo03871k), 2022-01-01
Supplement: d1fo03871k1.pdf [file d1fo03871k1.pdf]

Manuscript “**Cinnamaldehyde treatment during adolescence improves white and brown adipose tissue metabolism in a male rat model of early obesity**”

Food & Function

Jessika Geisebel Oliveira Neto<sup>a,b</sup>, Silvia Karl Boechat<sup>a</sup>, Juliana Santos Romão<sup>a</sup>, Lia Rafaella Ballard Kuhnert<sup>a</sup>, Carmen Cabanelas Pazos de Moura<sup>b</sup>, Karen Jesus Oliveira<sup>a\*</sup>.

<sup>a</sup>Universidade Federal Fluminense, Departamento de Fisiologia e Farmacologia, Niterói, 24210-130, RJ, Brazil

<sup>b</sup>Universidade Federal do Rio de Janeiro, Instituto de Biofísica Carlos Chagas Filho, Rio de Janeiro, 21949-900, RJ, Brazil

\* Corresponding author

Karen Jesus Oliveira

E-mail address: karenoliveira@id.uff.br

**S1:** Gene sequences used to assess mRNA expression.

| <b>Gene</b>     | <b>Protein</b>     | <b>Sequence</b>                                                                  |
|-----------------|--------------------|----------------------------------------------------------------------------------|
| <i>Acaca</i>    | ACC1               | Forward 5'-GCCTTACAGGATGGTTTGGCCTTT-3'<br>Reverse 5'-AACAAATTCTGCTGGCGAAGCCAC-3' |
| <i>Adrb3</i>    | AR $\beta$ 3       | Forward 5'-CGTTGCTTGTCTTTCTGTCTT-3'<br>Reverse 5'-AGAACTCACCGCTCAACAG-3'         |
| <i>Atp5f1b</i>  | ATP5B              | Forward 5'-GCATTTAGGGGAGAGCACCG-3'<br>Reverse 5'-TTTTGATTGGTGCCCCCGAA-3'         |
| <i>Cox4i1</i>   | COX4I1             | Forward 5'-CAGTGGCAGAATGTTGGCTA-3'<br>Reverse 5'-GCACACCGAAGTAGAAATGGC-3'        |
| <i>Dgat2</i>    | DGAT2              | Forward 5'-AGGCCTTGATGGTTTCTATCCA-3'<br>Reverse 5'-GCTGCCCTTCCCCAATTAAC-3'       |
| <i>Fasn</i>     | FAS                | Forward 5'-GTCACAGTGTCTCAGAGTTG-3'<br>Reverse 5'-AGGCCAGTGCATTAAGGATG-3'         |
| <i>Fgf21</i>    | FGF21              | Forward 5'-CAAATCCTGGGTGTCAAAGC-3'<br>Reverse 5'-GCCTCAGACTGGTACACATTG-3'        |
| <i>Gapdh</i>    | GAPDH              | Forward 5'-TCTCTGCTCCTCCCTGTT-3'<br>Reverse 5'-GTAACCAGGCGTCCGATA-3'             |
| <i>Il1b</i>     | IL1 $\beta$        | Forward 5'-TTGTGCTTGTCTCTCTCC-3'<br>Reverse 5'-GTGCTGTCTGACCCATGT-3'             |
| <i>Il6</i>      | IL6                | Forward 5'-TCCTACCCCAACTTCCAATGCTC-3'<br>Reverse 5'-TTGGATGGTCTTGGTCCTTAGCC-3'   |
| <i>Lep</i>      | Leptina            | Forward 5'-CCATCTTGGACAAACTCAGAATG-3'<br>Reverse 5'-GACCATTGTCACCAGGATCA-3'      |
| <i>Lpl</i>      | LPL                | Forward 5'-GCTTGTCAATTCTCAGTTCCAGA-3'<br>Reverse 5'-AGCCAAGAGAAGCAGTAAGATG-3'    |
| <i>Ndufb8</i>   | NADH dehydrogenase | Forward 5'-TGAACCGATACACTGGGACCT-3'<br>Reverse 5'-AGCCACAAAGCCGAAGAGAT-3'        |
| <i>Ppara</i>    | PPAR $\alpha$      | Forward 5'-TTCAATGCCCTCGAACTGGA-3'<br>Reverse 5'-GCACAATCCCCTCCTGCAAC-3'         |
| <i>Pparg</i>    | PPAR $\gamma$      | Forward 5'-AGCAGGTTGTCTTGGATGTC-3'<br>Reverse 5'-GAATTAGATGACAGTGACTIONTGGC-3'   |
| <i>Ppargc1a</i> | PGC1 $\alpha$      | Forward 5'-ACTGAGCTACCCTTGGGATG-3'<br>Reverse 5'-TAAGGATTTCCGGTGGTGACA-3'        |
| <i>Rplp0</i>    | 36 $\beta$ 4       | Forward 5'-TTCCCACTGGCTGAAAAGGT-3'<br>Reverse 5'-CGCAGCCGCAAATGC-3'              |
| <i>Sdhb</i>     | SDH                | Forward 5'-TCGCCATTTACCGATGGGAC-3'<br>Reverse 5'-GCACCATCGGTCCACACTTAT-3'        |
| <i>Sreb1c</i>   | SREBP1c            | Forward 5'-AAAACCAGCCTCCCCAGAGC-3'<br>Reverse 5'-CCAGTCCCCATCCACGAAGA-3'         |
| <i>Tnfa</i>     | TNF $\alpha$       | Forward 5'-GTCTTTGAGATCCATGCCATTG-3'<br>Reverse 5'-AGACCCTCACACTCAGATCA-3'       |
| <i>Ucp1</i>     | UCP1               | Forward 5'-TCAACACTGTGGAAAGGGACGACT-3'<br>Reverse 5'-TCTGCCAGTATGTGGTGGTTCACA-3' |
| <i>Uqcrc2</i>   | UQCRC2             | Forward 5'-CCGGGTCCTTCTCGAGATTTTAT-3'<br>Reverse 5'-AACTCAAGTTCCTGAGGCTGC-3'     |

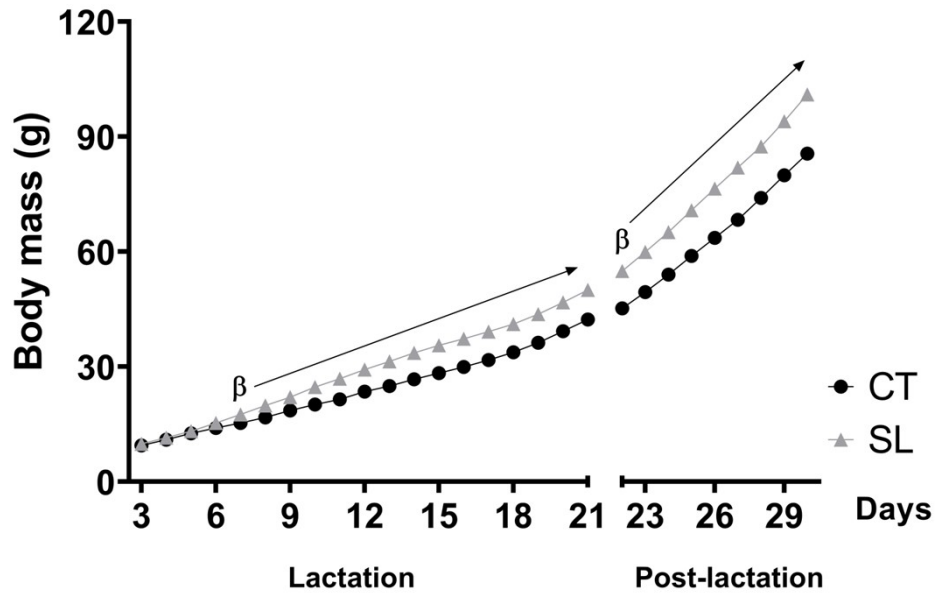

**S2:** Body mass evolution of control litters (●) and small litter (▲) during lactation and post-lactation period. The body mass was monitored daily. Control litter (CT); small litter (SL). ' $\beta$ ' Statistical differences of SL vs CT group. Differences between groups at the corresponding time points were analyzed by Two-way ANOVA followed by Bonferroni post-test.

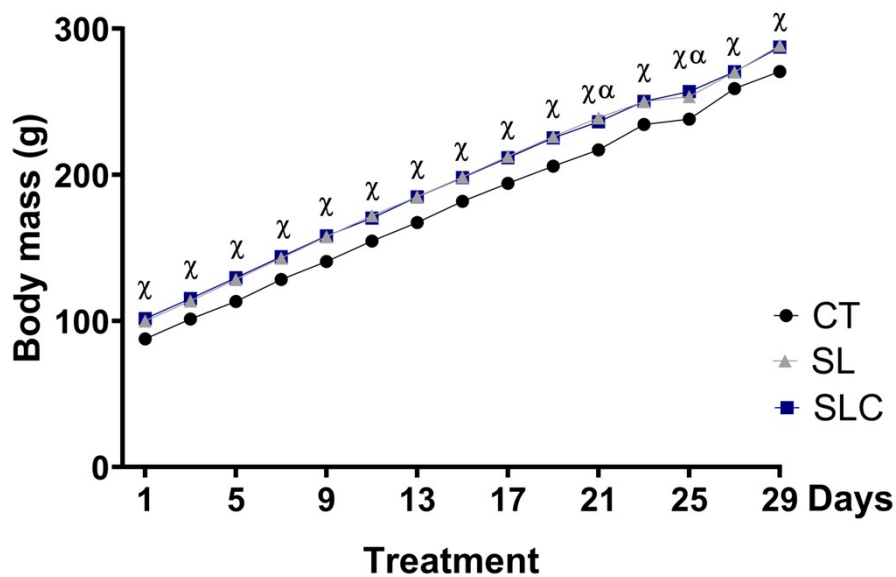

**S3:** Body mass evolution of CT group (●), SL group (▲), and SLC group (■) during treatment (30 days of age until 60 days of age). The body mass was monitored 3 times a week. Control group (CT); small litter group (SL); small litter group treated with cinnamaldehyde (SLC). ' $\chi$ ' Statistical differences of SL and SLC vs CT group. ' $\alpha$ ' Statistical differences of SL vs SLC group. Differences between groups at the corresponding time points were analyzed by Two-way ANOVA followed by Tukey post-test.

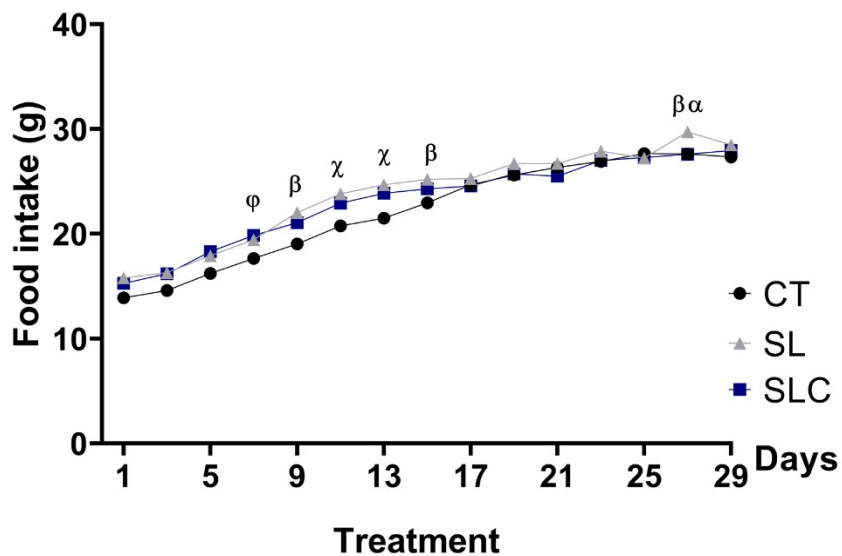

**S4:** Food intake evolution of CT group (●), SL group (▲), and SLC group (■) during treatment (30 days of age until 60 days of age). The food intake was monitored 3 times a week. Control group (CT); small litter group (SL); small litter group treated with cinnamaldehyde (SLC). ' $\phi$ ' Statistical differences of SLC vs CT group. ' $\beta$ ' Statistical differences of SL vs CT group. ' $\chi$ ' Statistical differences of SL and SLC vs CT group. ' $\alpha$ ' Statistical differences of SL vs SLC group. Differences between groups at the corresponding time points were analyzed by Two-way ANOVA followed by Tukey post-test.

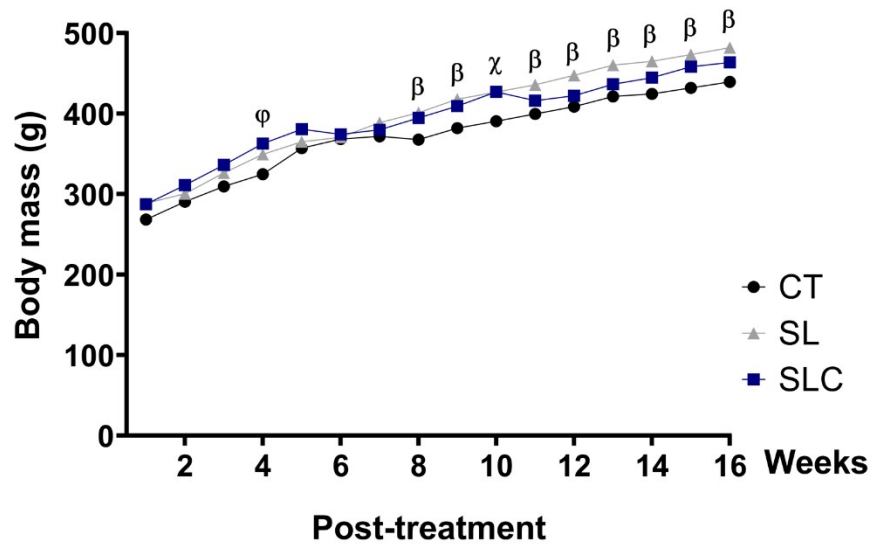

**S5:** Body mass evolution of CT group (●), SL group (▲), and SLC group (■) in the post-treatment period (60 days of age until 180 days of age). The body mass was monitored 3 times a week and is represented in the graphic as a weekly measure. Control group (CT); small litter group (SL); small litter group treated with cinnamaldehyde (SLC). ‘ $\phi$ ’ Statistical differences of SLC vs CT group. ‘ $\beta$ ’ Statistical differences of SL vs CT group. ‘ $\chi$ ’ Statistical differences of SL and SLC vs CT group. Differences between groups at the corresponding time points were analyzed by Two-way ANOVA followed by Tukey post-test.

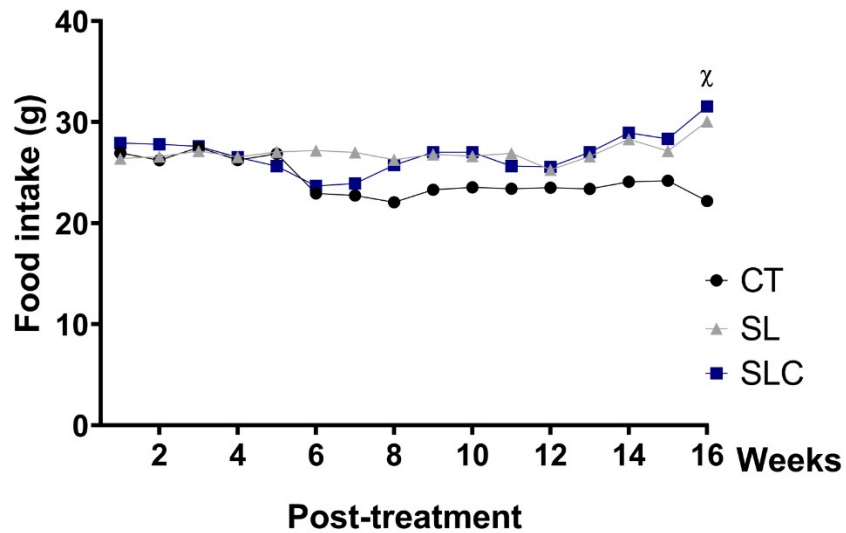

**S6:** Food intake evolution of CT group (●), SL group (▲), and SLC group (■) in the post-treatment period (60 days of age until 180 days of age). The food intake was monitored 3 times a week and is represented in the graphic as a weekly measure. Control group (CT); small litter group (SL); small litter group treated with cinnamaldehyde (SLC). ‘ $\chi$ ’ Statistical differences of SL and SLC vs CT group. Differences between groups at the corresponding time points were analyzed by Two-way ANOVA followed by Tukey post-test.
